# Supplementary material for: HCT Frailty Scale (HCT-FS) for Assessing Frailty in Allogeneic Hematopoietic Cell Transplant Patients. Results from a Canadian and Spanish Initiative
Source: Research Square preprint supplement (doi:10.21203/rs.3.rs-7145275/v1), 2025-07-27
Supplement: Supplementary file 1 [file f2c4b6cf189f61f65d928d42.docx]

**SUPPLEMENTARY MATERIAL**

**SECTION 1. HCT Frailty Scale.**

**Assessment Methodology.** The HCT Frailty Scale consists of eight variables, encompassing various tests, scales, and laboratory parameters. Below, we provide an overview of how these tests and scales are routinely evaluated:

- **Clinical Frailty Scale (CFS):** Ranging from 1 (robust health) to 9 (terminally ill), the CFS assesses the severity of frailty, taking into account the primary hematological disorder, patient comorbidities, function, and associated features. Initially validated in geriatric populations, the CFS has shown a strong correlation with adverse outcomes, such as hospitalization, falls, and mortality. Over time, its utility and predictive value has been recognized beyond geriatrics, with studies validating its use in various healthcare settings—including primary care, emergency departments, and specialties like cardiology, surgery, oncology, and hematology. These studies have demonstrated the importance of frailty as a predictor of outcomes across different contexts, and the value of the CFS for assessing risk, managing treatment intensity, and improving communication about patient prognosis (25).
- **Instrumental Activities of Daily Living (IADL) test:** The following questionnaire assesses eight domains related to the patient's independent functioning during the consultation. Unlike basic activities of daily living, IADL identifies how well a person performs more complex tasks. We utilized a modified version of the scale with a total score ranging from 0 to 8 (indicating complete independence). Any disability indicates dependency (<8 points).
- **Self-rated Health (SRH) Questionnaire**: Patients are asked to rate their current health compared to others of their age as excellent, very good, good, fair, or poor. Their response is recorded, reflecting their perceived health compared to peers.
- **Falls Question**: Patients are queried about any falls in the last 6 months, including frequency and reasons. Their responses are recorded.
- **Grip Strength Test:** Administered by providing a dynamometer to the patient and instructing them to hold it in their dominant hand at a 90-degree angle without support, squeezing as hard as possible. The test is repeated two times, and the higher value is recorded.
- **Timed Up and Go Test:** Patients are asked to walk 10 feet briskly from a seated position, without support from chair arms if possible. They walk to the end, turn around, return to their chair, and sit down, with the activity timed and recorded.
- **Serum Albumin and C-Reactive Protein**: These are included in the routine blood work drawn prior to the stem cell transplant consultation.

**SECTION 2. HCT Methodology**

**Eligible Criteria for HCT**

All patients aged 18 or older, with a Karnofsky performance score ≥60%, and without active/untreated infection were eligible for HCT. Criteria for pre-transplant organ function included the presence of a left ventricular ejection fraction ≥45%; no significant pre-existing cardiac disease or uncontrolled arrhythmia; pulmonary function test demonstrating a forced expiratory volume >45% of predicted, and a diffusing capacity of carbon monoxide >50% of predicted; and liver function tests showing total bilirubin <2.5 times normal, with transaminases <3 times the upper limit of normal and a creatinine level of <2 mg/dL.

**Donor Selection Algorithm**

The institutional donor selection algorithm for patients undergoing allo-HCT is as follows: a matched sibling donor followed by a 10/10 MLA matched unrelated donor were considered the first and second donor choices, respectively. In the absence of a suitably matched donor, alternative donor sources were selected such as 9/10 HLA mismatched unrelated donor and haploidentical sibling donors.

**Main Definitions**

Grading of acute and chronic GVHD (aGVHD and cGVHD) followed established criteria (31, 32, 53). Neutrophil engraftment was defined as an absolute neutrophil count >0.5x10^9/L for 3 consecutive days, and platelet engraftment as a platelet count >20x10^9/L for 7 consecutive days without transfusion support. Primary graft failure (GF) was defined as failure to reach neutrophil >0.5x10^9/L in the first 28 days post-stem cell transplantation or documentation of autologous reconstitution by chimerism analysis in the absence of relapse (54). Secondary GF was defined by treating physicians, with standard criteria across Europe involving the loss of a functioning graft demonstrated by cytopenia in at least two lineages and loss of donor chimerism. Complete remission (CR) and relapse were designated by treating physicians.

**SECTION 3. Supplementary Results:**

**Supplementary Table 1. Baseline Characteristics Associated with Frailty at the First Consultation.**

| **All patients** | **Frail (vs. Fit and Pre-Frail)**  **Odds Ratio (95% CI)** | **P value** |
| --- | --- | --- |
| **Age ranges (years)**  41-59 (vs. 18-40)  ≥ 60 (vs. 18-40) | 1.21 (0.71-2.08)  0.92 (0.53-1.61) | 0.472  0.780 |
| **Sex**  Female (vs. Male) | 0.92 (0.63-1.36) | 0.705 |
| **Karnofsky Performance Status**  <90% (vs. >90%) | 3-54 (2.40-5.22) | <0.001 |
| **HCT-CI**  >2 (vs. 0-2) | 2.30 (1.57-3.36) | <0.001 |
| **Disease Risk Index**  High / Very High (vs. Low/Intermediate) | 1.04 (0.67-1.52) | 0.835 |
| **Patients from PMCC (n=734)** | **Frail (vs. Fit and Pre-Frail)**  **Odds Ratio (95% CI)** | **P value** |
| **Age ranges (years)**  41-59 (vs. 18-40)  ≥ 60 (vs. 18-40) | 1.18 (0.60-2.30)  1.20 0.61-2.36) | 0.624  0.595 |
| **Sex**  Female (vs. Male) | 0.82 (0.5-1.33) | 0.438 |
| **Karnofsky Performance Status**  <90% (vs. >90%) | 5.55 83.41-9.03) | <0.001 |
| **HCT-CI**  >2 (vs. 0-2) | 1.99 (1.24-3.19) | 0.004 |
| **Disease Risk Index**  High / Very High (vs. Low/Intermediate) | 1.57 (0.88-2.81) | 0.126 |
| **Patients from 15-GETH-TC (n=343)** | **Frail (vs. Fit and Pre-Frail)**  **Odds Ratio (95% CI)** | **P value** |
| **Age ranges (years)**  41-59 (vs. 18-40)  ≥ 60 (vs. 18-40) | 1.39 (0.54-3.55)  0.57 (0.20-1.61) | 0.490  0.291 |
| **Sex**  Female (vs. Male) | 1.13 (0.56-2.28) | 0.728 |
| **Karnofsky Performance Status**  <90% (vs. >90%) | 2.08 (1.03-4.22) | 0.041 |
| **HCT-CI**  >2 (vs. 0-2) | 2.72 (1.35-5.47) | 0.005 |
| **Disease Risk Index**  High / Very High (vs. Low/Intermediate) | 0.88 (0.42-1.81) | 0.734 |

HCT-CI: Hematopoietic cell transplant-comorbidity index

**Note:** Results were analyzed in the entire cohort and separately in patients from the PMCC and GETH-TC institutions. The predictors of being classified as a frail patient were similar in the two cohorts of Canadian and Spanish patients.

**Supplementary Section 2. Applicability of the HCT Frailty Scale at PMCC and 15-GETH-TC Institutions.**

**Baseline Characteristics Associated with Frailty at the First Consultation.**

|  | **PMCC**  **734** | **GETH-TC**  **343 ()** | **P value** |
| --- | --- | --- | --- |
| **Pre-Transplant Baseline Information** |  |  |  |
| **Median age, year (range)**  **Older 60 years** | 56 (18-73)  277 (37.7) | 55 (18-76)  134 (39.1) | 0.247  0.676 |
| **Sex**  Male  Female | 413 (56.3)  321 (43.7) | 116 (33.8)  227 (66.2) | 0.002 |
| **Baseline Diagnosis**  AML  MDS, LMMC  ALL  NPM  LPD  MM  CML  Other | 370 (50.4)  134 (18.2)  68 (9.3)  66 (9.0)  38(5.2)  0  17 (2.3)  41 (5.5) | 128 (37.3)  80 (23.3)  45 (13.1)  26 (7.6)  42 (12.2)  12 (3.5)  5 (1.5)  5 (1.5) | 0.001 |
| **HCT-CI > 2**  Missing | 250 (34.1)  8 | 100 (29.2)  8 | 0.125 |
| **KPS <90%**  Missing | 123 (17.0)  12 | 142 (42.6)  10 | 0.001 |
| **Disease Risk Index**  Low/Intermediate  High / Very High DRI  Missing / N/A | 616 (84.3)  115 (15.7)  3 | 199 (62.2)  121 (37.8)  23 | 0.001 |
|  |  |  |  |
| **Conditioning Intensity**  MAC  RIC | 240 (32.7)  494 (67.3) | 163 (47.5)  180 (52.5) | 0.001 |
| **GVHD Prophylaxis**  PTCY-based | 626 () | 194 (56.6) | 0.001 |
| **Donor type**  HLA-matched Sibling  HLA-Matched Unrelated  9/10 Mismatched Unrelated  Haploidentical | 160 (21.8)  383 (52.2)  75 (10.2)  116 (15.8) | 110 (32.1)  111 (32.4)  37 (10.8)  85 (24.8) | 0.056 |
| **Stem Cell Source**  Peripheral Blood | 709 (96.6) | 328 (95.6) | 0.434 |
|  |  |  |  |
| **HCT Frailty Scale**  Fit  Pre-Frail  Frail | 267 (36.4)  373 (50.8)  94 (12.8) | 93 (27.1)  206 (60.1)  44 (12.5) | 0.001 |
|  |  |  |  |
| **Median Follow-up (IQR)*** | 702 (272-1468) | 608 (271-749) | 0.038 |

**Baseline characteristics associated with PMCC and GETH-TC populations:**

| **Multivariate Binary Logistic Regression Analysis** | **GETH-TC (vs. PMCC patients)**  **Odds Ratio (95% CI)** | **P value** |
| --- | --- | --- |
| **HCT-Frailty Scale**  Pre-Frail (vs. Fit)  Frail (vs. Fit) | 1.29 (0.94-1.78)  0.77 (0.47-1.27) | 0.112  0.312 |
| **Age ranges (years)**  41-59 (vs. 18-40)  ≥ 60 (vs. 18-40) | 0.96 (0.65-1.41)  0.91 (0.62-1.35) | 0.846  0.658 |
| **Sex**  Female (vs. Male) | 0.67 (0.50-0.91) | 0.010 |
| **Karnofsky Performance Status**  <90% (vs. >90%) | 3.75 (2.69-5.20) | <0.001 |
| **HCT-CI**  >2 (vs. 0-2) | 0.62 (0.45-0.85) | 0.003 |
| **Disease Risk Index**  High / Very High (vs. Low/Intermediate) | 2.88 (2.09-3.74) | <0.001 |

**Note:** This analysis shows that PMCC and GETH-TC cohorts included similar proportions of frail patients, as shown in the multivariate analysis. However, the underlying patient populations differed. While age distributions were comparable, the PMCC cohort included a higher proportion of female patients and individuals with greater comorbidity burden (HCT-CI ≥ 2). In contrast, the GTH-TC cohort had a higher prevalence of high or very high-risk disease (based on DRI) and poorer functional status (KPS < 90%).

**Supplementary Table 3. Impact of Frailty on Overall Survival and Non-Relapse Mortality. Univariate Regression Analysis.**

| **Multivariate Analysis** | **OS**  **HR (95% CI)** | **P value** | **NRM**  **HR (95% CI)** | **P value** |
| --- | --- | --- | --- | --- |
| **HCT Frailty Scale**  Frail (vs. Fit and Pre-Frail) | 1.82 (1.31-2.54) | <0.001 | 2.54 (1.66-2.90) | <0.001 |
| **Allo-HCT Location**  15 GETH-TC centers (vs. PMCC) | 1.04 (0.79-1.38) | 0.751 | 1.24 (0.85-1.81) | 0.240 |
| **HCT-FS and Allo-HCT Location**  15 GETH-TC centers* Frail status (vs. Others) | 0.81 (0.45-1.49) | 0.515 | 0.66 (0.31-1.38) | 0.280 |
| **Age**  > 64 years (vs. < 65 years) | 1.40 (1.07-1.84) | 0.012 | 1.80 (1.27-2.54) | <0.001 |
| **HCT-CI**  >2 (vs. 0-1) | 1.27 (1.01-1.58) | 0.038 | 1.36 (1.01-1.84) | 0.046 |
| **KPS**  <90% (vs. 90-100%) | 1.04 (0.81-1.34) | 0.748 | 1.01 (0.71-1.42) | 0.960 |
| **DRI**  High / Very High (vs. Low/Intermediate) | 1.77 (1.39-2.24) | <0.001 | 1.06 (0.74-1.50) | 0.740 |
| **Conditioning Intensity**  RIC (vs. MAC) | 1.19 (0.93-1.54) | 0.157 | 1.16 (0.82-1.64) | 0.390 |
| **Donor type**  9/10 MMUD and Haplo (vs. 10/10 HLA Matched) | 1.67 (1.33-2.09) | <0.001 | 1.95 (1.44-2.64) | <0.001 |
| **GVHD Prophylaxis**  PTCY-based (vs. other) | 0.90 (0.68-1.17) | 0.447 | 0.85 (0.59-1.23) | 0.410 |

**Note:** The multivariable analysis assessed whether the impact of frailty on OS and NRM differed between GETH-TC and Canadian patient subgroups. Frailty status was coded as a binary variable (1 = frail; 0 = fit or pre-frail), and transplant location as another binary variable (1 = Spain; 0 = Canada). An interaction variable between these two variables (frailty × transplant location) was added to the model to test whether the effect of frailty on transplant outcomes varied by country.

The results showed that the interaction variable was not statistically significant for either OS (HR: 0.81) or NRM (HR: 0.66), with p-values > 0.28. This result indicated that the negative effect of frailty on outcomes is consistent across both countries. Frailty independently increases the risk of death (OS HR: 1.82) and non-relapse mortality (NRM HR: 2.54), regardless of location.

**Supplementary Table 3. Impact of Frailty on Overall Survival and Non-Relapse Mortality. Univariate Regression Analysis.**

| **Univariate Analysis** | **OS**  **HR (95% CI)** | **P value** | **NRM**  **HR (95% CI)** | **P value** |
| --- | --- | --- | --- | --- |
| **HCT Frailty Scale**  Pre-Frail (vs. Fit)  Frail (vs. Fit) | 1.53 (1.19-1.95)  2.47 (1.81-3.38) | <0.001  <0.001 | 1.69 (1.19-2.40)  3.25(2.16-4.89) | 0.003  <0.001 |
| **Age continuous**  Age > 64 years (vs. < 65 years) | 1.01 (1.01-1.02)  1.45 (1.14-1.85) | <0.001  0.002 | 1.02 (1.01-1.03)  1.82 (1.34-2.47) | <0.001  <0.001 |
| **KPS**  <90% (vs. 90-100%) | 1.39 (1.11-1.75) | 0.003 | 1.46 (1.08-1.99) | 0.014 |
| **HCT-CI**  >2 (vs. 0-2) | 1.57 (1.23-2.01) | <0.001 | 1.66 (1.25-2.20) | <0.004 |
| **DRI**  High / Very High (vs. Low/Intermediate) | 1.82 (1.45-2.27) | <0.001 | 1.11 (0.80-1.55) | 0.51 |
| **Conditioning Intensity**  RIC (vs. MAC) | 1.38 (1.11-1.72) | 0.003 | 1.52 (1.12-2.05) | 0.006 |
| **Donor type**  9/10 MMUD and Haplo (vs. 10/10 HLA Matched) | 1.61 (1.30-1.99) | <0.001 | 1.84 (1.39-2.43) | <0.001 |
| **GVHD Prophylaxis**  PTCY-based (vs. other) | 0.95 (0.75-1.21) | 0.722 | 0.96 (0.70-1.32) | 0.84 |
